1    **RESEARCH NOTE**

2    **Early detection of SARS-CoV-2 infection cases or outbreaks at nursing homes by**  
3    **targeted wastewater tracking**

4    Laura Davó<sup>1</sup>, Raimundo Seguí<sup>1</sup>, Pilar Botija<sup>2</sup>, María José Beltrán<sup>3</sup>, Eliseo Albert<sup>4</sup>,  
5    Ignacio Torres<sup>4</sup>, Pablo Ángel López-Fernández<sup>5</sup>, Rafael Ortí<sup>5</sup>, Juan Francisco Maestre<sup>1\*</sup>,  
6    Gloria Sánchez<sup>6\*</sup> and David Navarro<sup>4,7\*</sup>

7    <sup>1</sup>*Global Omnium, Valencia, Spain*

8    <sup>2</sup>*Dirección de Atención Primaria, Departamento de Salud Clínico-Malvarrosa,*  
9    *Hospital Clínico Universitario de Valencia, Valencia, Spain*

10    <sup>3</sup>*Dirección de Enfermería, Departamento de Salud Clínico-Malvarrosa, Hospital*  
11    *Clínico Universitario de Valencia, Valencia, Spain*

12    <sup>4</sup>*Microbiology Service, Clinic University Hospital, INCLIVA Health Research Institute,*  
13    *Valencia, Spain.*

14    <sup>5</sup>*Department of Preventive Medicine and Quality Assurance, Clinic University Hospital,*  
15    *INCLIVA Health Research Institute, Valencia, Spain.*

16    <sup>6</sup>*Food Safety and Preservation Department, Institute of Agrochemistry and Food*  
17    *Technology (IATA-CSIC), Valencia, Spain.*

18    <sup>7</sup>*Department of Microbiology, School of Medicine, University of Valencia, Valencia,*  
19    *Spain.*

20    \*Senior authors contributed equally to the present work.

21

22

23 **ABSTRACT**

24 **Objectives:** Near-source tracking of SARS-CoV-2 RNA in the sewage drains serving  
25 particular buildings may allow rapid identification of SARS-CoV-2 infection cases or  
26 local outbreaks. In this pilot study, we investigated whether this was the case for  
27 nursing homes (NH).

28 **Methods:** The study involved five NH (from A to E) affiliated to the Clínico-  
29 Malvarrosa Health Department, Valencia (Spain). These were nursing or mixed  
30 nursing/care homes of different sizes, altogether providing care for 472 residents  
31 attended by a staff of 309. Near-source sewage samples were screened for presence of  
32 SARS-CoV-2 RNA by RT-qPCR at least 5 days per week during the study period.  
33 SARS-CoV-2 RNA testing in nasopharyngeal swabs from residents and staff was  
34 performed with the TaqPath COVID-19 Combo Kit (Thermo Fisher Scientific,  
35 Massachusetts, USA).

36 **Results:** SARS-CoV-2 RNA was detected in wastewater samples from four of the five  
37 NH. SARS-CoV-2 infection cases were documented in three of these four NH. Of the  
38 two NH without SARS-CoV-2 infection cases, no SARS-CoV-2 RNA was detected in  
39 sewer samples from one facility, while it was repeatedly detected in samples from the  
40 other. Presence of SARS-CoV-2 RNA in sewage preceded identification of isolated  
41 cases among residents or staff or outbreak declaration in two NH, with lag times  
42 ranging from 5 to 19 days.

43 **Conclusion:** Our study demonstrated that intermittent or persistent detection of SARS-  
44 CoV-2 RNA in NH sewers can provide an early warning of subsequent individual cases  
45 or outbreaks in these facilities.

46 **KEYWORDS:** SARS-CoV-2 RNA, Nursing homes, wastewater, near-source tracking,  
47 COVID-19 outbreak.

## 48 **INTRODUCTION**

49 Nursing homes (NH) have been severely affected by the COVID-19 pandemic, largely  
50 due to their congregate nature and the vulnerability of residents [1,2]. Advanced age,  
51 frailty and concurrence of underlying chronic health conditions place NH residents at  
52 high risk for developing severe forms of COVID-19 and death. In Spain, at least 50% of  
53 NH-resident deaths officially reported by the Ministry of Health have been directly or  
54 indirectly attributed to COVID-19. Early detection of SARS-CoV-2 outbreaks at NH  
55 through periodic and systematic RT-PCR screening of residents and personnel has been  
56 invoked as a seemingly effective strategy to rapidly blunt virus spread in this setting  
57 [3,4]. Routine implementation of this approach has encountered many logistical  
58 obstacles, however, and to our knowledge its cost-effectiveness has not been  
59 incontrovertibly proven. Long-lasting virus shedding of SARS-CoV-2 in urine and feces  
60 has been documented in both symptomatic and asymptomatic infected adults [5]. As a  
61 result, near-source tracking in the sewers serving particular buildings has emerged as an  
62 appealing non-invasive tool which when combined with subsequent targeted population  
63 screening when SARS-CoV-2 is detected may enable rapid identification and control of  
64 facility outbreaks [6,7].

65 In this pilot study, we provide evidence demonstrating the feasibility and utility of this  
66 wastewater-based epidemiological approach for early identification of isolated cases or  
67 outbreaks of SARS-CoV-2 infection in NH.

## 68 **MATERIAL AND METHODS**

### 69 **Nursing homes and sewage sampling**

70 This pilot study involved five NH (listed as A to E) facilities located in Northeast  
71 Valencia (Spain), affiliated to the Clínico-Malvarrosa Health Department. These were  
72 nursing or mixed nursing/care homes of different sizes (Table 1), altogether providing  
73 care for 472 residents attended by 309 staff. Selection from among the 17 NH supported  
74 by the Clínico-Malvarrosa Health Department was based upon two criteria: (i) existence  
75 of sewage drain(s) not shared with nearby buildings and (ii) personal autonomy of most  
76 residents. NH sewage drain(s) were monitored for presence of SARS-CoV-2 RNA by  
77 testing near-source wastewater samples at least 5 days per week from October 7 to  
78 December 28, 2020. All except one NH (NHE) had a single drain site. Grab samples  
79 were collected on site from water outlets at each facility. At NHE, hierarchical pooling  
80 involved testing a combination of multiple samples from different sampling sites.  
81 Positive pool samples were deconvoluted and individually tested. All samples were  
82 taken early in the morning, collecting 1 L of water in sterile plastic containers with  
83 sodium thiosulfate (VWR, USA). Water samples were transferred to the laboratory,  
84 refrigerated at 4 °C and concentrated within 24 h.

#### 85 **SARS-CoV-2 detection and quantitation in sewage samples**

86 Sewage water samples were analyzed at Global Omnium laboratory. Samples were  
87 concentrated using the aluminum adsorption-precipitation method [8,9]. A final  
88 concentrate was then obtained by centrifugation at  $1,900 \times g$  for 30 min; the resulting  
89 pellet was resuspended in 1 mL of PBS, pH 7.4. Viral extraction from wastewater  
90 concentrates was carried out using the NucleoSpin RNA virus Kit (MACHEREY-  
91 NAGEL, Germany). SARS-CoV-2 RNA detection was performed by RT-qPCR using  
92 One Step PrimeScript™ RT-PCR Kit (Perfect Real Time) (Takara Bio, USA), targeting  
93 the nucleoprotein (N), N1 and N2 fragments [10], and envelope protein (E) gene [11].  
94 RNA samples were analyzed in duplicate. Each RT-qPCR run included negative

95 (nuclease-free water) and positive controls. RT-qPCR targets were quantified by  
96 plotting the quantification cycles ( $C_T$ ) to an external standard curve built with 10-fold  
97 serial dilution of the 2019-nCoV\_N\_Positive Control and 2019-nCoV\_E\_Positive  
98 Control (IDT). Mengovirus RNA recovery rates were calculated and used as quality  
99 assurance parameters according to ISO 15216-1:2017 [12]. Results are reported as  
100 genome copies (GC)/L.

### 101 **SARS-CoV-2 testing in residents and staff**

102 Nasopharyngeal swabs (NP) for RT-PCR testing were collected by experienced nurses  
103 at the NH sites and immediately placed in 3 ml of Universal Transport Medium (UTM,  
104 Becton Dickinson, Sparks, MD, USA). RT-qPCRs were conducted within 24 h of  
105 specimen collection at the Microbiology Service of Hospital Clínico Universitario  
106 (Valencia, Spain) with the TaqPath COVID-19 Combo Kit (Thermo Fisher Scientific,  
107 Massachusetts, USA) [13]. RNA was extracted using the Applied Biosystems™  
108 MagMAX™ Viral/Pathogen II Nucleic Acid Isolation Kits coupled with Thermo  
109 Scientific™ KingFisher Flex automated instrument (Thermo Fisher Scientific).

### 110 **Ethics statement**

111 Permission to analyze the wastewater was granted by the nursing home operator and  
112 local authority responsible for the sewer system. Ethical approval for this study was  
113 waived by the Hospital Clínico Universitario INCLIVA Ethics Committee because RT-  
114 PCR testing either for diagnosis purposes or surveillance of both nursing home residents  
115 and staff are usual practices at health Department Clínico-Malvarrosa, Valencia, Spain.

### 116 **RESULTS**

117 SARS-CoV-2 RNA was detected in wastewater samples collected from four out of the  
118 five NH. The dynamics of SARS-CoV-2 RNA detection and viral loads measured at

119 each NH are shown in Figure 1. SARS-CoV-2 infection cases, either asymptomatic or  
120 symptomatic, were documented in three of the four NH (Table 1). No cases were  
121 identified at NHD within the study period, despite repeated detection of SARS-CoV-2  
122 RNA in the sewage drain. Of note, residents and staff at NHD were screened by RT-  
123 PCR on October 29, twelve days after SARS-CoV-2 was first detected in sewage, all  
124 yielding negative results. SARS-CoV-2 RNA was not detected in samples collected  
125 from NHC and no cases were documented throughout the follow-up period. The  
126 timespan between first SARS-CoV-2 RNA detection in sewage and index case  
127 diagnosis at each NH is shown in Table 1 (and depicted in Figure 1). Presence of  
128 SARS-CoV-2 RNA in sewage preceded identification of isolated cases among residents  
129 or staff (in both cases symptomatic) or outbreak declaration in two NH (NHA at during  
130 two different time periods, and NHB). Repeated detection of SARS-CoV-2 RNA was  
131 not documented until after outbreak declaration in the case of NHE (Table 1), although  
132 it should be noted that between October 7 and first case detection on October 17 only  
133 two of the four sewage drains at NHE had been sampled.

134 SARS-CoV-2 RNA levels in wastewater samples increased exponentially over the  
135 course of NH outbreaks (NHA and NHE), reaching peak levels above 8.0 log<sub>10</sub> GC/L  
136 (Figure 1).

137 Finally, disappearance of SARS-CoV-2 RNA from sewers was associated with control  
138 of outbreaks or absence of new case documentation following implementation of  
139 adequate measures (isolation of positive case and quarantining of close contacts)  
140 (Figure 1). The SARS-CoV-2 outbreak at NHA is currently still active.

## 141 **DISCUSSION**

142 Wastewater SARS-CoV-2 RT-PCR testing has emerged as an efficient strategy for  
143 epidemiological surveillance of COVID-19, as traces of SARS-CoV-2 RNA frequently  
144 predate detection of cases in the community by between 4 and 15 days [8,14-16].  
145 Likewise, tracking SARS-CoV-2 in sewer systems from different facilities (i.e. campus  
146 dorms, workplaces, correctional facilities, schools) may allow early documentation of  
147 SARS-CoV-2 circulation, thus potentially contributing to prompt blunting of viral  
148 transmission [6,7]. Results from this study suggested that SARS-CoV-2 RNA  
149 surveillance of sewage drains may indeed serve as an early warning system for isolated  
150 cases or outbreak declaration of SARS-CoV-2 infection in NH. This was found to be the  
151 case in NHA and NHB with lag times ranging from 5 to 19 days, and although  
152 speculative, could also have been the case in NHE, had we not missed two out of the  
153 four sewage drains at NH. Of analogous importance was the fact that SARS-CoV-2  
154 RNA traces were not detected in NHC, the facility in which no cases were reported  
155 within the study period.

156 An intriguing observation was that repeated detection (at 8 time points) of SARS-CoV-  
157 2 in NHD sewers was neither preceded nor followed by case detection in this facility.  
158 Furthermore, all residents and staff at NHD were screened by RT-PCR as part of this  
159 pilot experiment a few days after first SARS-CoV-2 RNA detection in sewage, all  
160 returning negative results. Although a plausible explanation for this was that  
161 precautionary measures to avoid virus transmission were maximized following first  
162 detection of SARS-CoV-2 RNA in this particular facility, and that any infected  
163 resident/s or staff member/s may have yielded false-negative RT-PCR results [17], a  
164 thorough investigation conducted after systematic screening of NHD population  
165 revealed the existence of cross-contamination between sewage drains of this NH and  
166 that of an adjacent building, that had gone unnoticed.

167 On the other hand, as expected, SARS-CoV-2 RNA levels in sewage drains increased  
168 dramatically during outbreak periods.

169 The main limitation of the current study is the relatively limited number of NH recruited  
170 for the study.

171 In conclusion, this pilot study proved that intermittent or persistent detection of SARS-  
172 CoV-2 RNA in NH sewage drains often anticipates declaration of individual cases or  
173 outbreaks. Frequent SARS-CoV-2 RT-qPCR sewage testing coupled with targeted  
174 screening of residents and staff may prove useful for early blunting of virus  
175 transmission and spread at NH. Further studies with a larger site sample are warranted  
176 to confirm this assumption.

#### 177 **ACKNOWLEDGMENTS**

178 We thank all personnel working in the nursing homes and the Hospital Clínico  
179 Universitario of Valencia for their unwavering commitment in the fight against COVID-  
180 19.

#### 181 **FINANCIAL SUPPORT**

182 This work received no public or private funds.

#### 183 **CONFLICTS OF INTEREST**

184 The authors declare no conflicts of interest.

#### 185 **AUTHOR CONTRIBUTIONS**

186 LD, RS, EA, IT: methodology and data validation. LA, RS, JFM, GS and DN: formal  
187 analysis. LD, RS, JFM, GS and DN: Conceptualization, supervision. PB, MJB, PL-F  
188 and RO: supervision of RT-PCR testing at NH facilities. LD, GS and DN: writing the  
189 original draft. All authors reviewed and approved the original draft.

190

#### 191 **REFERENCES**



- 192 1. Grabowski DC, Mor V. Nursing Home Care in Crisis in the Wake of COVID-19.  
193 JAMA. 2020;324:23-24.
- 194 2. Werner RM, Hoffman AK, Coe NB. Long-Term Care Policy after Covid-19 -  
195 Solving the Nursing Home Crisis. N Engl J Med 2020;383:903-905.
- 196 3. CDC. Coronavirus disease 2019 (COVID-19): testing guidance for nursing homes.  
197 Atlanta, GA: US Department of Health and Human Services, CDC; 2020.  
198 <https://www.cdc.gov/coronavirus/2019-ncov/hcp/nursing-homes-testing.html>.
- 199 4. Dora AV, Winnett A, Jatt LP, Davar K, Watanabe M, Sohn L, et al. Universal and  
200 Serial Laboratory Testing for SARS-CoV-2 at a Long-Term Care Skilled Nursing  
201 Facility for Veterans - Los Angeles, California, 2020. MMWR Morb Mortal Wkly Rep.  
202 2020 May 29;69(21):651-655.
- 203 5. Walsh KA, Jordan K, Clyne B, Rohde D, Drummond L, Byrne P, et al. SARS-CoV-2  
204 detection, viral load and infectivity over the course of an infection. J Infect  
205 2020;81:357-371.
- 206 6. Hamouda M, Mustafa F, Maraqa M, Rizvi T, Aly Hassan A. Wastewater surveillance  
207 for SARS-CoV-2: Lessons learnt from recent studies to define future applications. Sci  
208 Total Environ 2020 Nov 7:143493.
- 209 7. Hassard F, Lundy L, Singer AC, Grimsley J, Di Cesare M. Innovation in wastewater  
210 near-source tracking for rapid identification of COVID-19 in schools. Lancet Microb  
211 2020;DOI:[https://doi.org/10.1016/S2666-5247\(20\)30193-2](https://doi.org/10.1016/S2666-5247(20)30193-2).
- 212 8. Randazzo W, Cuevas-Ferrando E, Sanjuán R, Domingo-Calap P, Sánchez G.  
213 Metropolitan wastewater analysis for COVID-19 epidemiological surveillance. Int J  
214 Hyg Environ Health 2020;230:11362.

- 215 9. Pérez-Cataluña A, Cuevas-Ferrando E, Randazzo W, Falcó I, Allende A, Sánchez G.  
216 Comparing analytical methods to detect SARS-CoV-2 in wastewater. *Sci Total Environ*  
217 2020;758:143870.
- 218 10. CDC, 2020. CDC 2019-novel coronavirus (2019-nCoV) real-time RT-PCR  
219 diagnostic panel [WWW Document]. URL. <https://www.fda.gov/media/134922/download>.
- 220 11. Corman VM, Landt O, Kaiser M, Molenkamp R, Meijer A, Chu DK, et al.  
221 Detection of 2019 novel coronavirus (2019-nCoV) by real-time RT-PCR. *Euro Surveill*  
222 2020;25(3):2000045.
- 223 12. ISO 15216-1, 2017. Microbiology of the Food Chain - Horizontal Method for  
224 Determination of Hepatitis A Virus and Norovirus Using Real-Time RT-PCR - Part 1:  
225 Method for Quantification. ISO 15216-1:2017.
- 226 13. Albert E, Torres I, Bueno F, Huntley D, Molla E, Fernández-Fuentes MÁ, et al.  
227 Field evaluation of a rapid antigen test (Panbio™ COVID-19 Ag Rapid Test Device) for  
228 COVID-19 diagnosis in primary healthcare centres. *Clin Microbiol Infect* 2020 Nov  
229 13:S1198-743X(20)30697-2.
- 230 14. Nemudryi A, Nemudraia A, Wiegand T, Surya K, Buyukyoruk M, Cicha C, et al.  
231 Temporal detection and phylogenetic assessment of SARS-CoV-2 in municipal  
232 wastewater. *Cell Rep Med* 2020;1(6):100098.
- 233 15. Peccia J, Zulli A, Brackney DE, Grubaugh ND, Kaplan EH, Casanovas-Massana A,  
234 et al. Measurement of SARS-CoV-2 RNA in wastewater tracks community infection  
235 dynamics. *Nat Biotechnol* 2020;38:1164-116.

236 16. Randazzo W, Truchado P, Cuevas-Ferrando E, Simón P, Allende A, Sánchez G.  
237 SARS-CoV-2 RNA in wastewater anticipated COVID-19 occurrence in a low  
238 prevalence area. *Water Res* 2020;181:115942.

239 17. Zou L, Ruan F, Huang M, Liang L, Huang H, Hong Z, et al. SARS-CoV-2 Viral  
240 Load in Upper Respiratory Specimens of Infected Patients. *N Engl J Med*  
241 2020;382:1177-1179.

242

### 243 **FIGURE LEGEND**

244

245 **Figure 1.** Dynamics of SARS-CoV-2 RNA detection in sewage drains of nursing  
246 homes (NH). SARS-CoV-2 RNA loads ( $\log_{10}$  genome copies-GC-/L) at each time  
247 point are mean values of duplicate measurements at NH with a single sewage drain  
248 (NHA, NHB, NHC, NHD) or mean values quantified at the different sampling sites of  
249 the facility (NHE). Arrows point to the date of first detection of cases among residents  
250 or staff at a given NH.

medRxiv preprint doi: <https://doi.org/10.1101/2021.01.21.21249640>; this version posted January 22, 2021. The copyright holder for this preprint (which was not certified by peer review) is the author/funder, who has granted medRxiv a license to display the preprint in perpetuity. It is made available under a [CC-BY-NC-ND 4.0 International license](https://creativecommons.org/licenses/by-nc-nd/4.0/).

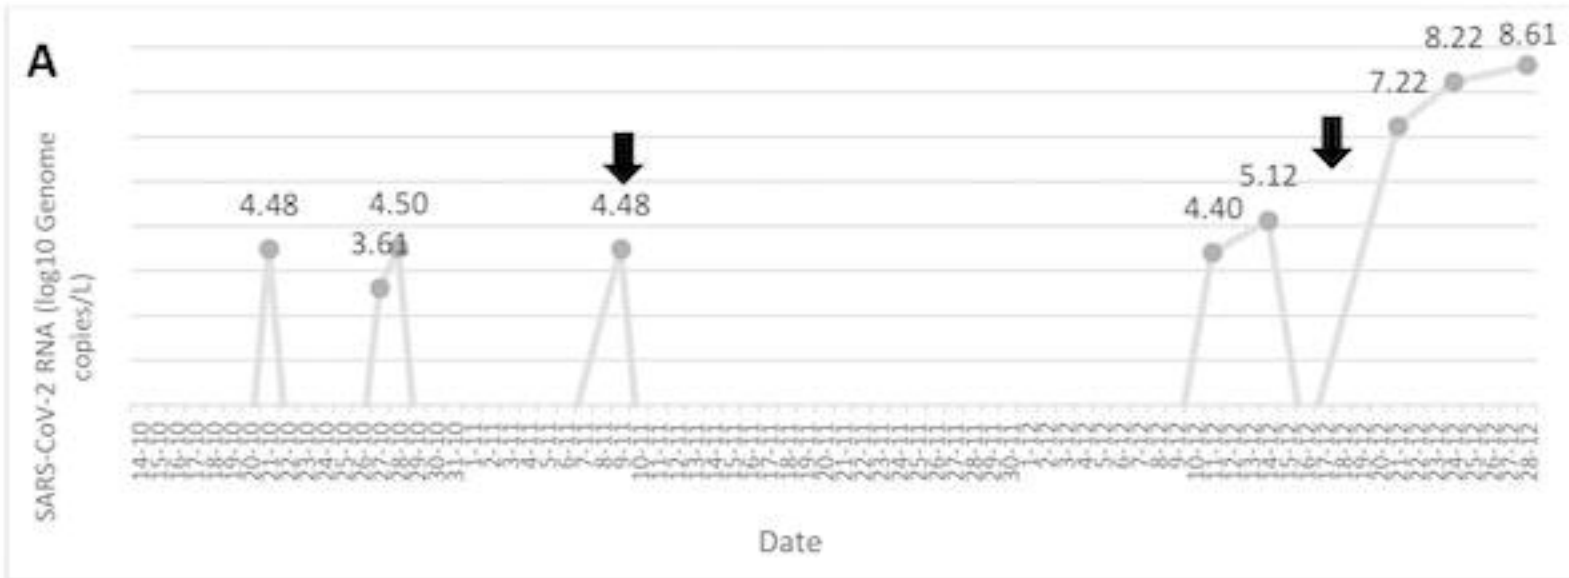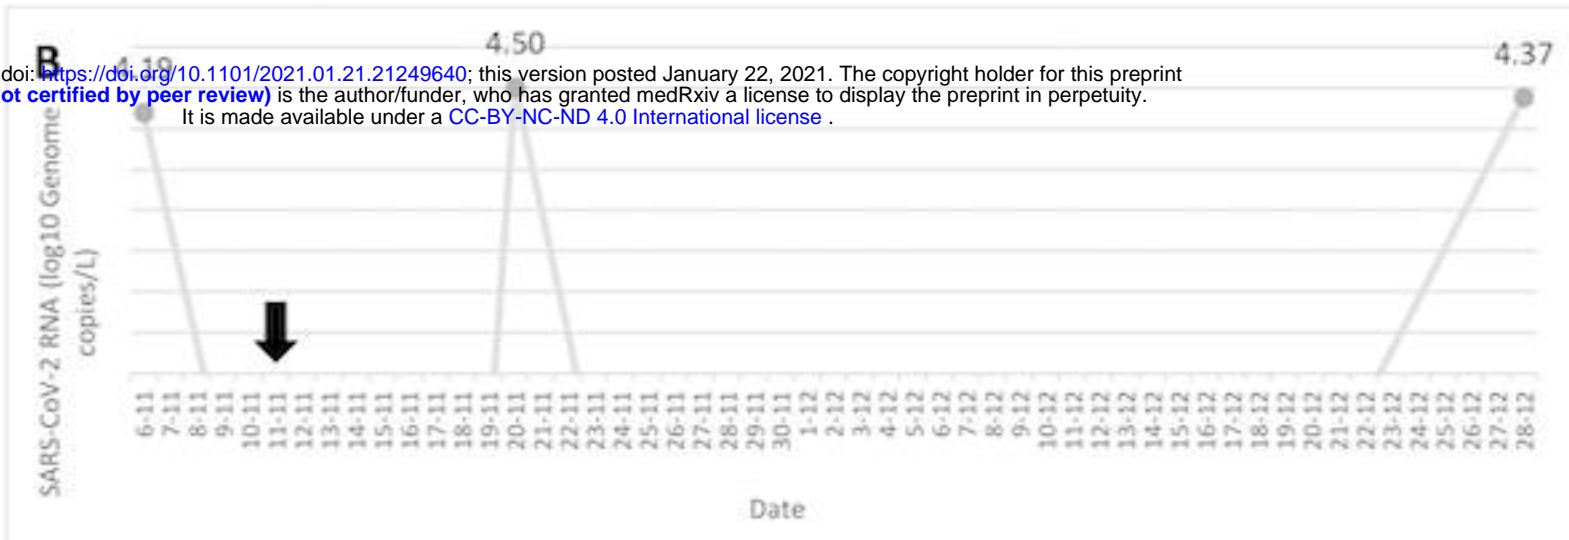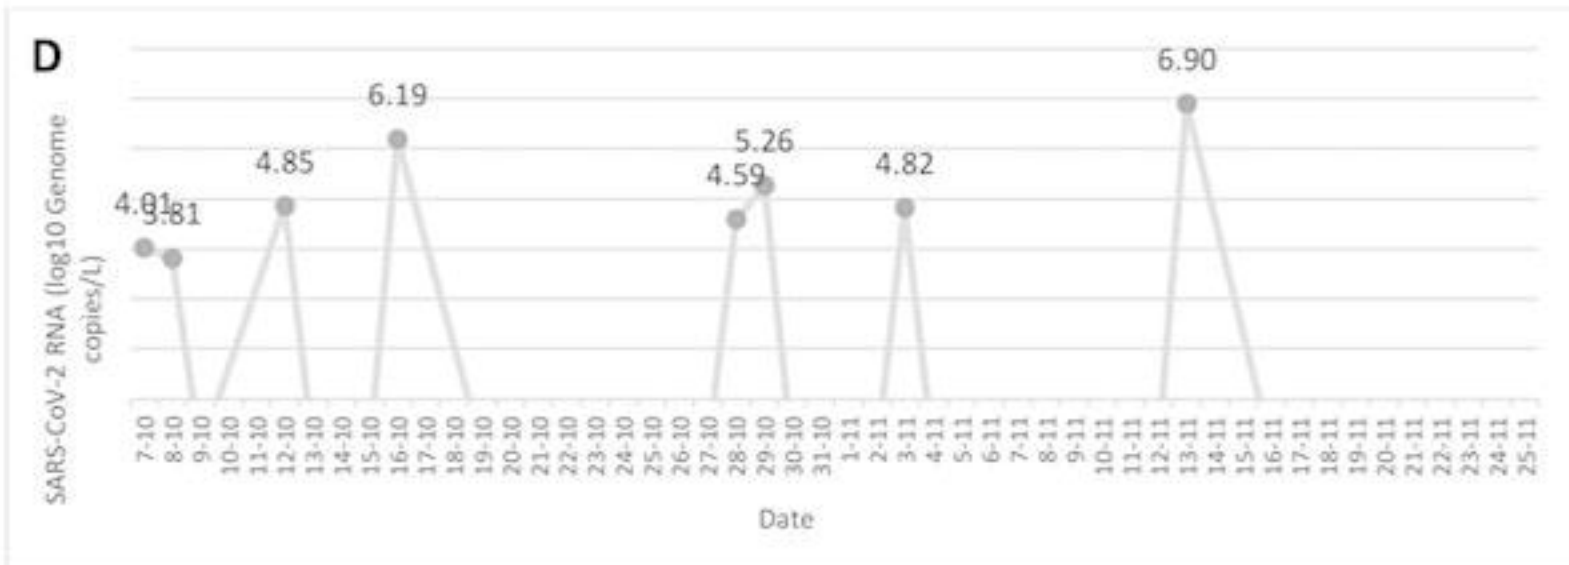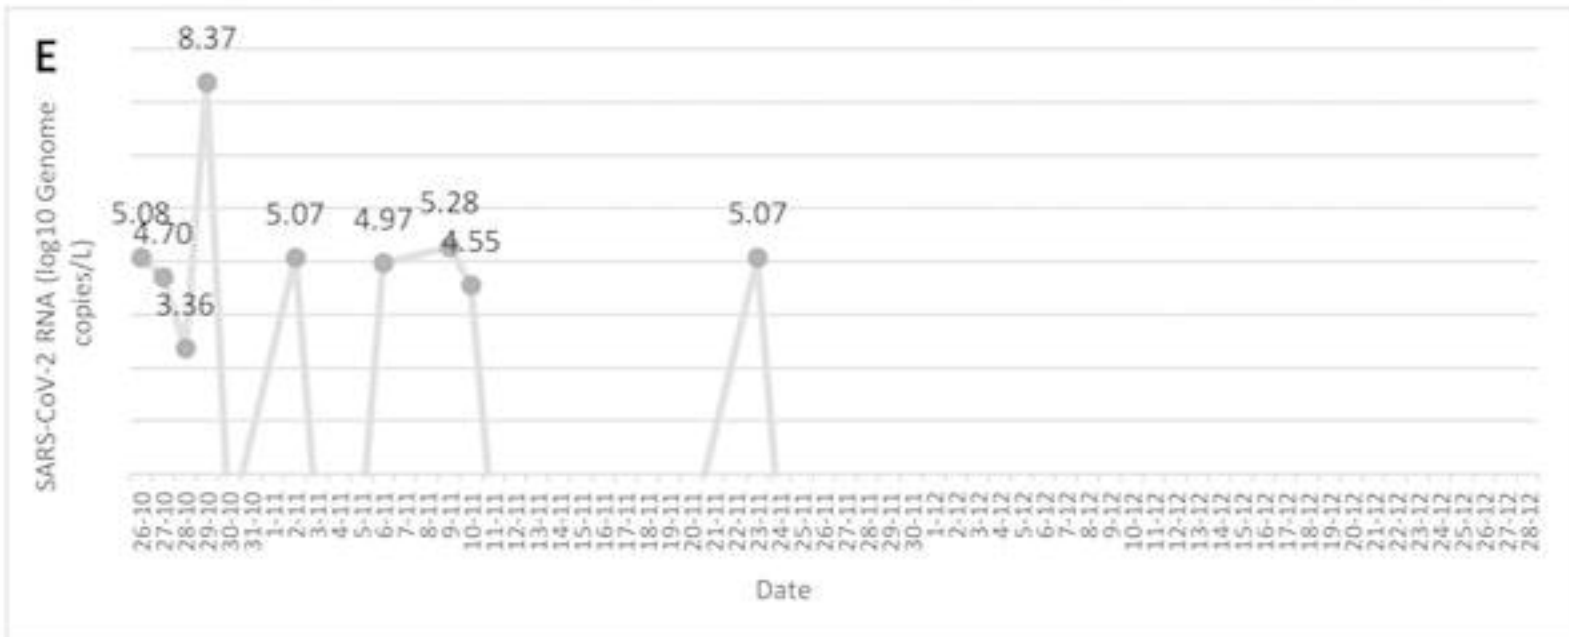

**Table 1. Detection of SARS-CoV-2 in wastewater, residents and staff at nursing homes included in the study**

| <b>Nursing home (no. of residents/staff)</b> | <b>Surveillance period</b> | <b>Date of first detection of SARS-CoV-2 RNA in wastewater</b> | <b>Date of first reported case of SARS-CoV-2 infection at the nursing home</b> | <b>No. of residents testing positive for SARS-CoV-2</b> | <b>No. of staff testing positive for SARS-CoV-2</b> | <b>Last SARS-CoV-2 infection case documented among residents or staff</b> | <b>Previous outbreaks</b>    |
|----------------------------------------------|----------------------------|----------------------------------------------------------------|--------------------------------------------------------------------------------|---------------------------------------------------------|-----------------------------------------------------|---------------------------------------------------------------------------|------------------------------|
| <b>A</b> (103/58)                            | October 14-December 28     | October 21                                                     | November 9                                                                     | 1                                                       | -                                                   | November 9                                                                | Yes (June 16)                |
| <b>A</b> (103/58)                            | October 14-December 28     | December 10                                                    | December 17                                                                    | 25                                                      | 13                                                  | Outbreak ongoing                                                          | Yes (June 16 and October 21) |
| <b>B</b> (105/60)                            | November 6-December 28     | November 6                                                     | November 11                                                                    | -                                                       | 1                                                   | November 11                                                               | Yes (June 17 and October 5)  |
| <b>C</b> (48/25)                             | November 6-December 28     | ND                                                             | NR                                                                             | -                                                       | -                                                   | -                                                                         | No                           |
| <b>D</b> (101/81)                            | October 7-December 28      | October 7                                                      | NR <sup>a</sup>                                                                | -                                                       | -                                                   | -                                                                         | Yes (July 9)                 |
| <b>E</b> (115/85)                            | October 7-December 28      | October 26 <sup>b</sup>                                        | October 17                                                                     | 14                                                      | 10                                                  | November 16                                                               | Yes (June 17 and July 13)    |

ND, not detected; NR, not reported

<sup>a</sup>Residents and Staff members were screened for SARS-CoV-2 infection by RT-PCR on October 29.

<sup>b</sup>Two of the four sewage draining sites were not tested until October 26.
